# Supplementary material for: Sequencing-Based Approaches Reveal Low Ambient Temperature-Responsive and Tissue-Specific MicroRNAs in Phalaenopsis Orchid
Source: PLoS One. 2011 May 6;6(5):e18937. doi: 10.1371/journal.pone.0018937 (PMC3089612; doi:10.1371/journal.pone.0018937)
Supplement: Table S2 — Summary table of target genes with contigs and functional categorization. (XLS) [file pone.0018937.s002.xls]

## Sheet: Sheet1
miRNA family	Sequence	Length	Untreated leave	Low temperature-treated leave	Stalk	Flower bud	Relative change*	gene description	homolog in Ara.	contig	molecular function	biological process
miR156/157	CUGACAGAAGAUAGAGAGCAC	21	6210	18459	656	3539	2.97246	SPL2 (SQUAMOSA PROMOTER BINDING PROTEIN-LIKE 2)	AT5G43270	bud_contig10396,con_contig02447	sequence-specific DNA binding transcription factor activity	regulation of timing of transition from vegetative to reproductive phase
	UGACAGAAGAUAGAGAGCAC	20	1928	3628	146	995	1.88174	SPL4 (SQUAMOSA PROMOTER BINDING PROTEIN-LIKE 4)	AT1G53160	bud_contig02973	sequence-specific DNA binding transcription factor activity	regulation of vegetative phase change
	UGACAGAAGAGAGUGAGCAC	20	3527	9067	2174	3512	2.57074	SPL9 (SQUAMOSA PROMOTER BINDING PROTEIN-LIKE 9)	AT2G42200	sta_contig06230	sequence-specific DNA binding transcription factor activity	vegetative to reproductive phase transition of meristem
								small nuclear ribonucleoprotein, putative	AT1G21190	chi_contig02836,con_contig10356	unknown	unknown
								TUA5 | tubulin alpha-5	AT5G19780	chi_contig15231	structural constituent of cytoskeleton	microtubule-based process
								BEL1 | POX (plant homeobox) family protein	AT5G41410	chi_contig01115	sequence-specific DNA binding transcription factor activity	ovule development
								putative dolichol kinase	AT3G45040	bud_contig11946,chi_contig09171	phosphatidate cytidylyltransferase activity	phospholipid biosynthetic process
miR159	UUUGGAUUGAAGGGAGCU	18	125	234	182	537	1.872	MYB65 (MYB DOMAIN PROTEIN 65)	AT3G11440	bud_contig09388	sequence-specific DNA binding transcription factor activity	gibberellic acid mediated signaling pathway
	UUUGGAUUGAAGGGAGCUCUA	21	321	541	319	730	1.68536	CM1 (chorismate mutase 1)	AT3G29200	chi_contig14372	chorismate mutase activity	aromatic amino acid family biosynthetic process
	UUUGCAUAACUCAGGAGCUGG	21	451	1082	2345	2353	2.39911	AT1G14710 [Arabidopsis thaliana]	AT1G14710	sta_contig04533	unknown	unknown
								kinase interacting family protein	AT3G22790	chi_contig00965	unknown	unknown
miR162	UCGAUAAACCUCUGCAUCCGG	21	338	508	253	588	1.50296	Mog1/PsbP/DUF1795-like photosystem II reaction center PsbP family protein	AT5G11450	bud_contig04146	calcium ion binding	photosynthesis
miR164	UGGAGAAGCAGGGCACGUGUU	21	675	964	9	49	1.42815	NAC1 (NAC domain containining 1)	AT1G56010	con_contig22368	sequence-specific DNA binding transcription factor activity	auxin mediated signaling pathway
	UGGAGAAGCAGGGCACGUGCA	21	3244	3847	966	3970	1.18588	E13L3 (GLUCAN ENDO-1,3-BETA-GLUCOSIDASE-LIKE PROTEIN 3)	AT5G08000	sta_contig04746	polysaccharide binding	unknown
	UGGAGAAGCAGGGCACAUGUU	21	262	374	14	85	1.42748	VLN1 (VILLIN-LIKE 1); actin binding / actin filament binding	AT2G29890	sta_contig04348	actin binding	cytoskeleton organization
	GGAGAAGCAGGGCACGUGCA	20	323	449	86	392	1.39009	HA5 | H(+)-ATPase 5	AT2G24520	bud_contig03088,sta_contig09061	ATPase activity	ATP biosynthetic process
miR166	UCGGACCAGGCUUCCUUCCCC	21	1718	662	649	715	0.385332	PHB (PHABULOSA); DNA binding / transcription factor	AT2G34710	bud_contig12202,sta_contig03806	sequence-specific DNA binding transcription factor activity	primary shoot apical meristem specification
	GGACCAGGCUUCAUUCCCC	19	125	189	37	133	1.512	ATPREP1 (PRESEQUENCE PROTEASE 1); metalloendopeptidase	AT3G19170	bud_contig04169,chi_contig07006	unknown	proteolysis
	GGAAUGUUGUCUGGCUCGAGG	21	145	452	577	485	3.11724	SUMO1 (SMALL UBIQUITIN-LIKE MODIFIER 1)	AT4G26840	sta_contig12631	protein tag	protein sumoylation
								Galactose oxidase/kelch repeat superfamily protein	AT1G18610	bud_contig08311	unknown	unknown
								transducin family protein / WD-40 repeat family protein	AT5G43920	con_contig03008	nucleotide binding	unknown
								SHM7 (serine hydroxymethyltransferase 7)	AT1G36370	sta_contig03615	catalytic activity	response to cadmium ion
miR167	UGAAGCUGCCAGCAUGAUCUGUUC	24	148	213	16	11	1.43919	ARF6 (AUXIN RESPONSE FACTOR 6)	AT1G30330	bud_contig00316,sta_contig07607	sequence-specific DNA binding transcription factor activity	flower development
	UGAAGCUGCCAGCAUGAUCUGU	22	7989	9590	306	495	1.2004	ARF8 (AUXIN RESPONSE FACTOR 8)	AT5G37020	bud_contig04997,sta_contig11435,con_contig18547	sequence-specific DNA binding transcription factor activity	flower development
	UGAAGCUGCCAGCAUGAUCUGA	22	30209	33605	492	2423	1.11242	ATMC5 (ARABIDOPSIS THALIANA METACASPASE 5)	AT1G79330	chi_contig12319,bud_contig07609	unknown	induction of apoptosis
	UGAAGCUGCCAGCAUGAUCUG	21	617	784	10	86	1.27066	RPT2 (ROOT PHOTOTROPISM 2)	AT2G30520	bud_contig04629,sta_contig09914	signal transducer activity	phototropism
								AFB2 (auxin signaling F-box 2)	AT3G26810	con_contig15572	auxin binding	stamen development
miR168	UCGCUUGGUGCAGGUCGGGAU	21	3317	7131	1855	2218	2.14983	AGO1	AT1G48410	sta_contig11531,con_contig11836,bud_contig08741,bud_contig08747	endoribonuclease activity	posttranscriptional gene silencing
	UCGCUUGGUGCAGGUCGGGAC	21	14838	33578	21836	18712	2.26297
	UCGCUUGGUGCAGGUCGGGAA	21	15098	18286	10300	8330	1.21115
	UCGCUUGGUGCAGGUCGGGA	20	1167	1926	1036	599	1.65039
	CGCUUGGUGCAGGUCGGGAAU	21	722	1164	803	236	1.61219
	CGCUUGGUGCAGGUCGGGAA	20	551	756	436	277	1.37205
miR169	CAGCCAAGGAUGACUUGCCGA	21	120	100	156	3929	0.83	eukaryotic translation initiation factor 6 (eif-6)-like protein	AT3G55620	sta_contig09235	translation initiation factor activity	embryo development ending in seed dormancy
miR171	UUGAGCCGCGUCAAUAUCUCC	21	122	94	13	41	0.77	HAIRY MERISTEM 3 (HAM3)	AT4G00150	chi_contig05772,bud_contig03140,sta_contig04285,chi_contig00845,sta_contig04510	sequence-specific DNA binding transcription factor activity	regulation of transcription
								VPS24.1 (vacuolar protein sorting-associated protein 24 homolog 1); SNF7 family protein	AT5G22950	chi_contig01617,sta_contig06979,con_contig08426	unknown	vesicle-mediated transport
								ZIP1 (ZINC TRANSPORTER 1 PRECURSOR)	AT3G12750	sta_contig05263	zinc ion transmembrane transporter activity	zinc ion transport
miR172	GAAUCUUGAUGAUGCUGCAU	20	600	271	1617	900	0.451667	dihydrolipoamide S-acetyltransferase, putative	AT3G13930	con_contig09929	dihydrolipoyllysine-residue acetyltransferase activity	pyruvate metabolic process
	CGAAUCUUGAUGAUGCUGCAU	21	9491	4490	460	163	0.47308	ATGSL10 (glucan synthase-like 10)	AT3G07160	sta_contig08722	1,3-beta-glucan synthase activity	developmental growth
	AGAAUCUUGAUGAUGCUGCAU	21	221	339	14719	6790	1.53394	SMC3 (STRUCTURAL MAINTENANCE OF CHROMOSOMES 3)	AT2G27170	bud_contig11027	ATP binding	chromosome segregation
	AGAAUCAUGAUGAUGCUGCAA	21	1995	897	472	2094	0.449624
miR390	AAGCUCAGGAGGGAUAGCGCC	21	296	279	190	165	0.94	FEI2 (FEI 2); kinase	AT2G35620	bud_contig11128	kinase activity	plant-type cell wall organization
miR396	UUCCACAGCUUUCUUGAACUG	21	210	164	23	51	0.780952	GRF2 (Growth regulatory factor 2)	AT4G37740	bud_contig11424,sta_contig06118	transcription activator activity	leaf development
	UUCAAUAAAGCUGUGGGAAA	20	137	251	14	47	1.83212	GRF5 (Growth regulatory factor 5)	AT3G13960	con_contig13562,bud_contig08161	transcription activator activity	leaf development
	UUCAAGACAGCUGUGGGAAA	20	246	476	152	300	1.93496	LOX2 (lipoxygenase 2)	AT3G45140	bud_contig04847	lipoxygenase activity	jasmonic acid biosynthetic process
	GUUCAAUAAAGCUGUGGGAAA	21	116	169	17	44	1.4569	protein kinase family protein	AT3G03940	bud_contig09972	kinase activity	protein phosphorylation
	GUUCAAGACAGCUGUGGGAAA	21	167	324	215	223	1.94012	alpha/beta-Hydrolases superfamily protein	AT1G47480	con_contig17233,chi_contig15051	hydrolase activity	metabolic process
								Polyketide cyclase/dehydrase and lipid transport superfamily protein	AT5G28010	chi_contig16813,sta_contig07399	unknown	response to biotic stimulus
								MSD1 (MANGANESE SUPEROXIDE DISMUTASE 1)	AT3G10920	con_contig02834,chi_contig03397,sta_contig05164	superoxide dismutase activity	removal of superoxide radicals
								MEKK1 (MAP KINASE KINASE KINASE 1)	AT4G08500	bud_contig12309	kinase activity	response to cold
								MAPKKK5 (mitogen-activated protein kinase kinase kinase 5)	AT5G66850	sta_contig12401	kinase activity	protein phosphorylation
								PIE1 (PHOTOPERIOD-INDEPENDENT EARLY FLOWERING 1)	AT3G12810	bud_contig09657	helicase activity	negative regulation of flower development
								NPQ1 (NON-PHOTOCHEMICAL QUENCHING 1); violaxanthin de-epoxidase	AT1G08550	sta_contig02344	violaxanthin de-epoxidase activity	xanthophyll metabolic process
								APX1 (ascorbate peroxidase 1)	AT1G07890	sta_contig01624	L-ascorbate peroxidase activity	hydrogen peroxide catabolic process
								xylose isomerase family protein	AT5G57655	sta_contig07783	xylose isomerase activity	carbohydrate metabolic process
								PTAC2 (PLASTID TRANSCRIPTIONALLY ACTIVE 2)	AT1G74850	con_contig08314	unknown	transcription from plastid promoter
								Neutral/alkaline non-lysosomal ceramidase	AT2G38010	bud_contig12455,sta_contig08170,chi_contig00999,con_contig03935	ceramidase activity	unknown
miR397	UUGAGGGCAGCGUUGAUGAAA	21	442	612	104	1420	1.38	LAC17 (laccase 17)	AT5G60020	sta_contig00126,sta_contig02332,,sta_contig06657,sta_contig08224	laccase activity	lignin catabolic process
								STP1 (sugar transporter 1)	AT1G11260	sta_contig05859	sugar:hydrogen symporter activity	transmembrane transport
								ASP2 (aspartate aminotransferase 2)	AT5G19550	chi_contig15267	L-aspartate:2-oxoglutarate aminotransferase activity	nitrogen compound metabolic process
								CKA2 (casein kinase II, alpha chain 2)	AT3G50000	con_contig00694	kinase activity	protein phosphorylation
miR528	UGGAAGGGGCAUGCAGAGGCG	21	101	277	14	203	2.74257	HTA12 (histone H2A 12)	AT5G02560	bud_contig13010,sta_contig07357	DNA binding	nucleosome assembly
	UGGAAGGGGCAUGCAGAGGAGA	22	480	3020	254	1190	6.29167	HUA1 (floral homeotic protein)	AT3G12680	chi_contig05419,con_contig06367,sta_contig01925	RNA binding	cell fate determination
	UGGAAGGGGCAUGCAGAGGAG	21	42295	145318	8211	100341	3.43582	Core-2/I-branching beta-1,6-N-acetylglucosaminyltransferase family protein	AT3G24040	con_contig13133	transferase activity	unknown
	UGGAAGGGGCAUGCAGAGGA	20	343	1285	111	1383	3.74636	SKIP6 (SKP1 interacting partner 6)	AT2G21950	chi_contig08493	ubiquitin-protein ligase activity	unknown
	UGGAAGGGGCAUGCAGAG	18	217	625	42	793	2.88018	unknown protein	AT1G45688	con_contig04338	unknown	unknown
	GGAAGGGGCAUGCAGAGGAG	20	1271	4990	254	3325	3.92604
miR535	UUGACAAAGAGAGAGAGCACG	21	617	770	4	28	1.24797	CHX15 (cation/hydrogen exchanger 15)	AT2G13620	chi_contig08409,con_contig05940	sodium:hydrogen antiporter activity	cation transport
	UGACAACGAGAGAGAGCACGC	21	13241	24177	4375	22461	1.82592	TUA5 (tubulin alpha-5)	AT5G19780	chi_contig15231	structural constituent of cytoskeleton	response to cadmium ion
	GACAACGAGAGAGAGCACGC	20	368	728	116	578	1.97826	SPL2 (SQUAMOSA PROMOTER BINDING PROTEIN-LIKE 2)	AT5G43270	bud_contig10396,con_contig02447,sta_contig06230	sequence-specific DNA binding transcription factor activity	regulation of timing of transition from vegetative to reproductive phase
	UGACGAUGAGAGAGAGCACGC	21	311	723	517	12077	2.32476	DNA/RNA helicase protein	AT5G05130	sta_contig08473	helicase activity
								Protein kinase protein with adenine nucleotide alpha hydrolases-like domain	AT1G77280	bud_contig04416,chi_contig16010,con_contig22914,sta_contig09113	protein kinase activity	protein phosphorylation
miR894	GUUUCACGUCGGGUUCACCA	20	1408	1969	1059	898	1.39844	MTSSB (mitochondrially targeted single-stranded DNA binding protein)	AT4G11060	bud_contig01605	single-stranded DNA binding	AT1G77280
								Transcription initiation factor IIF, beta subunit |	AT1G75510	chi_contig15732,con_contig03570	RNA polymerase II transcription factor activity	transcription initiation from RNA polymerase II promoter
								CPN10 (chaperonin 10)	AT1G14980	bud_contig12000,sta_contig13058	chaperone binding	protein folding
								RNA-binding (RRM/RBD/RNP motifs) family protein	AT2G35410	con_contig22149	RNA binding	unknown
