# Supplementary material for: Sequencing-Based Approaches Reveal Low Ambient Temperature-Responsive and Tissue-Specific MicroRNAs in Phalaenopsis Orchid
Source: PLoS One. 2011 May 6;6(5):e18937. doi: 10.1371/journal.pone.0018937 (PMC3089612; doi:10.1371/journal.pone.0018937)
Supplement: Table S5 — Characteristics of undefined low ambient temperature-responsive small RNAs. (XLS) [file pone.0018937.s005.xls]

## Sheet: Sheet1
index	sID	seq	tar_contig	homolog description	expectation	NL	CL	CL/NL ratio
1	s1004	TTCTGACTTAGAGGCGTTCAG	bud_contig07118	alliin lyase	0	578	973	1.68
2	s0011	ATTAGCACAGACGACTGTTTTA	chi_contig15868	digalactosyldiacylglycerol synthase	0	397	163	0.41
2	s0011	ATTAGCACAGACGACTGTTTTA	sta_contig01856	at5g46290 mpl12_7	3	397	163	0.41
2	s0011	ATTAGCACAGACGACTGTTTTA	con_contig00805	scarecrow gene regulator	3	397	163	0.41
2	s0011	ATTAGCACAGACGACTGTTTTA	sta_contig08114	digalactosyldiacylglycerol synthase	0	397	163	0.41
2	s0011	ATTAGCACAGACGACTGTTTTA	bud_contig08771	digalactosyldiacylglycerol synthase	0	397	163	0.41
2	s0011	ATTAGCACAGACGACTGTTTTA	con_contig22112	at5g46290 mpl12_7	3	397	163	0.41
2	s0011	ATTAGCACAGACGACTGTTTTA	chi_contig02624	at5g46290 mpl12_7	3	397	163	0.41
2	s0017	AAGGGTGATTAGCACAGACGA	sta_contig08114	digalactosyldiacylglycerol synthase	0	1115	495	0.44
2	s0017	AAGGGTGATTAGCACAGACGA	bud_contig08771	digalactosyldiacylglycerol synthase	0	1115	495	0.44
2	s0017	AAGGGTGATTAGCACAGACGA	chi_contig15868	digalactosyldiacylglycerol synthase	0	1115	495	0.44
2	s0022	GGTGATTAGCACAGACGACT	bud_contig08771	digalactosyldiacylglycerol synthase	0	228	105	0.46
2	s0022	GGTGATTAGCACAGACGACT	chi_contig15868	digalactosyldiacylglycerol synthase	0	228	105	0.46
2	s0022	GGTGATTAGCACAGACGACT	sta_contig08114	digalactosyldiacylglycerol synthase	0	228	105	0.46
2	s0033	GGTGATTAGCACAGACGACTG	chi_contig15868	digalactosyldiacylglycerol synthase	0	2097	1052	0.5
2	s0033	GGTGATTAGCACAGACGACTG	bud_contig08771	digalactosyldiacylglycerol synthase	0	2097	1052	0.5
2	s0033	GGTGATTAGCACAGACGACTG	sta_contig08114	digalactosyldiacylglycerol synthase	0	2097	1052	0.5
2	s0042	TGATTAGCACAGACGACTGTTTT	chi_contig15868	digalactosyldiacylglycerol synthase	0	216	112	0.52
2	s0042	TGATTAGCACAGACGACTGTTTT	sta_contig08114	digalactosyldiacylglycerol synthase	0	216	112	0.52
2	s0042	TGATTAGCACAGACGACTGTTTT	bud_contig08771	digalactosyldiacylglycerol synthase	0	216	112	0.52
2	s0049	TTAGCACAGACGACTGTTTTAC	bud_contig08771	digalactosyldiacylglycerol synthase	0	210	112	0.53
2	s0049	TTAGCACAGACGACTGTTTTAC	chi_contig15868	digalactosyldiacylglycerol synthase	0	210	112	0.53
2	s0049	TTAGCACAGACGACTGTTTTAC	sta_contig07414	at3g51730 t18n14_110	3	210	112	0.53
2	s0049	TTAGCACAGACGACTGTTTTAC	chi_contig07072	rubisco subunit binding-protein alpha subunit	3	210	112	0.53
2	s0049	TTAGCACAGACGACTGTTTTAC	sta_contig08114	digalactosyldiacylglycerol synthase	0	210	112	0.53
2	s0049	TTAGCACAGACGACTGTTTTAC	sta_contig08546	rubisco subunit binding-protein alpha subunit	3	210	112	0.53
2	s0049	TTAGCACAGACGACTGTTTTAC	bud_contig00609	rubisco subunit binding-protein alpha subunit	3	210	112	0.53
2	s0049	TTAGCACAGACGACTGTTTTAC	con_contig23230	at5g01800 t20l15_70	3	210	112	0.53
2	s0049	TTAGCACAGACGACTGTTTTAC	chi_contig17001	at5g01800 t20l15_70	3	210	112	0.53
2	s0065	TTAGCACAGACGACTGTTTTA	con_contig22112	at5g46290 mpl12_7	3	1893	1088	0.57
2	s0065	TTAGCACAGACGACTGTTTTA	chi_contig15868	digalactosyldiacylglycerol synthase	0	1893	1088	0.57
2	s0065	TTAGCACAGACGACTGTTTTA	sta_contig01856	at5g46290 mpl12_7	3	1893	1088	0.57
2	s0065	TTAGCACAGACGACTGTTTTA	chi_contig02624	at5g46290 mpl12_7	3	1893	1088	0.57
2	s0065	TTAGCACAGACGACTGTTTTA	con_contig23230	at5g01800 t20l15_70	3	1893	1088	0.57
2	s0065	TTAGCACAGACGACTGTTTTA	chi_contig17001	at5g01800 t20l15_70	3	1893	1088	0.57
2	s0065	TTAGCACAGACGACTGTTTTA	bud_contig08771	digalactosyldiacylglycerol synthase	0	1893	1088	0.57
2	s0065	TTAGCACAGACGACTGTTTTA	sta_contig08114	digalactosyldiacylglycerol synthase	0	1893	1088	0.57
2	s0065	TTAGCACAGACGACTGTTTTA	sta_contig07414	at3g51730 t18n14_110	3	1893	1088	0.57
2	s0078	ATTAGCACAGACGACTGTTTT	chi_contig02624	at5g46290 mpl12_7	3	2215	1336	0.6
2	s0078	ATTAGCACAGACGACTGTTTT	chi_contig15868	digalactosyldiacylglycerol synthase	0	2215	1336	0.6
2	s0078	ATTAGCACAGACGACTGTTTT	con_contig00805	scarecrow gene regulator	3	2215	1336	0.6
2	s0078	ATTAGCACAGACGACTGTTTT	con_contig22112	at5g46290 mpl12_7	3	2215	1336	0.6
2	s0078	ATTAGCACAGACGACTGTTTT	sta_contig01856	at5g46290 mpl12_7	3	2215	1336	0.6
2	s0078	ATTAGCACAGACGACTGTTTT	sta_contig08114	digalactosyldiacylglycerol synthase	0	2215	1336	0.6
2	s0078	ATTAGCACAGACGACTGTTTT	bud_contig08771	digalactosyldiacylglycerol synthase	0	2215	1336	0.6
2	s0091	TGATTAGCACAGACGACTGTTT	bud_contig10668	er lumen protein retaining receptor	3	1087	700	0.64
2	s0091	TGATTAGCACAGACGACTGTTT	con_contig02750	er lumen protein retaining receptor	3	1087	700	0.64
2	s0091	TGATTAGCACAGACGACTGTTT	chi_contig02624	at5g46290 mpl12_7	3	1087	700	0.64
2	s0091	TGATTAGCACAGACGACTGTTT	con_contig22112	at5g46290 mpl12_7	3	1087	700	0.64
2	s0091	TGATTAGCACAGACGACTGTTT	chi_contig15868	digalactosyldiacylglycerol synthase	0	1087	700	0.64
2	s0091	TGATTAGCACAGACGACTGTTT	sta_contig01856	at5g46290 mpl12_7	3	1087	700	0.64
2	s0091	TGATTAGCACAGACGACTGTTT	sta_contig08114	digalactosyldiacylglycerol synthase	0	1087	700	0.64
2	s0091	TGATTAGCACAGACGACTGTTT	bud_contig08771	digalactosyldiacylglycerol synthase	0	1087	700	0.64
2	s0091	TGATTAGCACAGACGACTGTTT	sta_contig09895	er lumen protein retaining receptor	3	1087	700	0.64
2	s0218	AAGGGTGATTAGCACAGACGACTG	chi_contig15868	digalactosyldiacylglycerol synthase	0	157	135	0.86
2	s0218	AAGGGTGATTAGCACAGACGACTG	bud_contig08771	digalactosyldiacylglycerol synthase	0	157	135	0.86
2	s0218	AAGGGTGATTAGCACAGACGACTG	sta_contig08114	digalactosyldiacylglycerol synthase	0	157	135	0.86
3	s0001	TGGTCTGTACAACAACAGCAGA	chi_contig09502	trehalose-6-phosphate synthase	3	1304	300	0.23
3	s0001	TGGTCTGTACAACAACAGCAGA	con_contig02403	trehalose-6-phosphate synthase	3	1304	300	0.23
3	s0001	TGGTCTGTACAACAACAGCAGA	bud_contig14545	at4g15540 dl3810w	3	1304	300	0.23
3	s0001	TGGTCTGTACAACAACAGCAGA	sta_contig08598	beta-xylosidase-like protein	3	1304	300	0.23
3	s0001	TGGTCTGTACAACAACAGCAGA	sta_contig13711	vacuolar membrane atpase subunit g	2	1304	300	0.23
4	s0534	TGGAGCAATGTAGGCAAGGGAA	bud_contig01001	potassium transporter	2	430	485	1.13
4	s0534	TGGAGCAATGTAGGCAAGGGAA	con_contig22921	acidic ribosomal protein	2	430	485	1.13
4	s0534	TGGAGCAATGTAGGCAAGGGAA	sta_contig07957	luminal binding protein	0	430	485	1.13
4	s0534	TGGAGCAATGTAGGCAAGGGAA	sta_contig13188	metal-binding isoprenylated protein	3	430	485	1.13
4	s0534	TGGAGCAATGTAGGCAAGGGAA	sta_contig02061	potassium transporter	2	430	485	1.13
4	s0737	TCGATGGAGCAATGTAGGCAA	sta_contig07957	luminal binding protein	0	781	1036	1.33
4	s0821	TGGAGCAATGTAGGCAAGGGA	chi_contig15229	potassium transporter	2	633	914	1.44
4	s0821	TGGAGCAATGTAGGCAAGGGA	sta_contig02061	potassium transporter	2	633	914	1.44
4	s0821	TGGAGCAATGTAGGCAAGGGA	con_contig22921	acidic ribosomal protein	2	633	914	1.44
4	s0821	TGGAGCAATGTAGGCAAGGGA	bud_contig01001	potassium transporter	2	633	914	1.44
4	s0821	TGGAGCAATGTAGGCAAGGGA	sta_contig07957	luminal binding protein	0	633	914	1.44
4	s0933	TCGATGGAGCAATGTAGGCAAG	sta_contig07957	luminal binding protein	0	145	230	1.59
4	s0933	TCGATGGAGCAATGTAGGCAAG	sta_contig05220	cysteine synthase	3	145	230	1.59
4	s1101	TGGAGCAATGTAGGCAAGGGAAGTCG	sta_contig07957	luminal binding protein	0	168	315	1.88
4	s1114	TCGATGGAGCAATGTAGGCAAGG	sta_contig07957	luminal binding protein	0	230	436	1.9
4	s1123	TGGAGCAATGTAGGCAAGGGAAGTC	sta_contig07957	luminal binding protein	0	551	1063	1.93
4	s1158	TGGAGCAATGTAGGCAAGGGAAGT	sta_contig07957	luminal binding protein	0	110	225	2.05
4	s1163	TGGAGCAATGTAGGCAAGGG	sta_contig03662	leucine-rich repeat receptor-like protein kinase	3	186	384	2.06
4	s1163	TGGAGCAATGTAGGCAAGGG	chi_contig15229	potassium transporter	2	186	384	2.06
4	s1163	TGGAGCAATGTAGGCAAGGG	bud_contig01001	potassium transporter	2	186	384	2.06
4	s1163	TGGAGCAATGTAGGCAAGGG	sta_contig02061	potassium transporter	2	186	384	2.06
4	s1163	TGGAGCAATGTAGGCAAGGG	con_contig22921	acidic ribosomal protein	2	186	384	2.06
4	s1163	TGGAGCAATGTAGGCAAGGG	sta_contig07957	luminal binding protein	0	186	384	2.06
4	s1163	TGGAGCAATGTAGGCAAGGG	bud_contig14413	leucine-rich repeat receptor-like protein kinase	3	186	384	2.06
4	s1199	TGGAGCAATGTAGGCAAGGGAAG	sta_contig07957	luminal binding protein	0	117	259	2.21
4	s1199	TGGAGCAATGTAGGCAAGGGAAG	sta_contig13188	metal-binding isoprenylated protein	3	117	259	2.21
4	s1199	TGGAGCAATGTAGGCAAGGGAAG	con_contig22921	acidic ribosomal protein	2	117	259	2.21
5	s0475	TGGAAGTAGTTTTACGGCATT	con_contig11657	dof51_arath ame: full=dof zinc finger protein short=	2	3047	3302	1.08
6	s0073	TCTACTCTCAAGTTTGATTGCA	chi_contig07694	type 2a protein serine threonine phosphatase 55 kda b regulatory subunit	2	1190	701	0.59
6	s0153	TCTACTCTCAAGTTTGATTGC	chi_contig07694	type 2a protein serine threonine phosphatase 55 kda b regulatory subunit	2	229	178	0.78
6	s0506	CTGAATTGCAGTTCCGAACGGG	bud_contig07118	alliin lyase	0	178	198	1.11
6	s0506	CTGAATTGCAGTTCCGAACGGG	chi_contig16488	hypothetical protein [Arabidopsis thaliana]	0	178	198	1.11
6	s0527	TGAATTGCAGTTCCGAACGGGC	bud_contig07118	alliin lyase	0	216	242	1.12
6	s0527	TGAATTGCAGTTCCGAACGGGC	chi_contig16488	hypothetical protein [Arabidopsis thaliana]	0	216	242	1.12
6	s0664	CTGAATTGCAGTTCCGAACGG	chi_contig16488	hypothetical protein [Arabidopsis thaliana]	0	1120	1397	1.25
6	s0664	CTGAATTGCAGTTCCGAACGG	con_contig02764	predicted protein of unknown function [Arabidopsis thaliana]	2	1120	1397	1.25
6	s0664	CTGAATTGCAGTTCCGAACGG	sta_contig05006	predicted protein of unknown function [Arabidopsis thaliana]	2	1120	1397	1.25
6	s0664	CTGAATTGCAGTTCCGAACGG	bud_contig07118	alliin lyase	0	1120	1397	1.25
6	s0866	TGAAGAACAGAACTAGCATAGACA	chi_contig08556	type 2a protein serine threonine phosphatase 55 kda b regulatory subunit	2	592	889	1.5
6	s1032	TGAATTGCAGTTCCGAACGGG	chi_contig16488	hypothetical protein [Arabidopsis thaliana]	0	1651	2886	1.75
6	s1032	TGAATTGCAGTTCCGAACGGG	bud_contig07118	alliin lyase	0	1651	2886	1.75
6	s1058	TGAATTGCAGTTCCGAACGG	chi_contig16488	hypothetical protein [Arabidopsis thaliana]	0	541	970	1.79
6	s1058	TGAATTGCAGTTCCGAACGG	con_contig02764	predicted protein of unknown function [Arabidopsis thaliana]	2	541	970	1.79
6	s1058	TGAATTGCAGTTCCGAACGG	sta_contig05006	predicted protein of unknown function [Arabidopsis thaliana]	2	541	970	1.79
6	s1058	TGAATTGCAGTTCCGAACGG	bud_contig07118	alliin lyase	0	541	970	1.79
7	s0147	GAACTTGTCGGCAAATAAAACGGT	con_contig05876	af361603_1at5g53310 k19e1_11	2	1021	778	0.76
7	s0147	GAACTTGTCGGCAAATAAAACGGT	bud_contig12524	af361603_1at5g53310 k19e1_11	2	1021	778	0.76
7	s0367	GAACTTGTCGGCAAATAAAACGG	bud_contig12524	af361603_1at5g53310 k19e1_11	2	160	159	0.99
7	s0367	GAACTTGTCGGCAAATAAAACGG	con_contig05876	af361603_1at5g53310 k19e1_11	2	160	159	0.99
7	s0424	GAACTTGTCGGCAAATAAAATGGT	bud_contig12524	af361603_1at5g53310 k19e1_11	3	309	321	1.04
7	s0424	GAACTTGTCGGCAAATAAAATGGT	con_contig05876	af361603_1at5g53310 k19e1_11	3	309	321	1.04
8	s0342	GAACTTATTAGATACCGGATA	con_contig24543	ribulose- -bisphosphate carboxylase oxygenase large subunit	1	116	113	0.97
8	s0342	GAACTTATTAGATACCGGATA	bud_contig03186	y4213_arath ame: full=upf0480 protein at4g32130 flags: precursor	3	116	113	0.97
8	s0744	GAACTTATTAGATACCGGATT	con_contig24543	ribulose- -bisphosphate carboxylase oxygenase large subunit	0	1390	1865	1.34
8	s0813	GAACTTATTAGATACCGGATC	chi_contig02051	y4213_arath ame: full=upf0480 protein at4g32130 flags: precursor	2	133	190	1.43
8	s0813	GAACTTATTAGATACCGGATC	sta_contig12450	y4213_arath ame: full=upf0480 protein at4g32130 flags: precursor	2	133	190	1.43
8	s0813	GAACTTATTAGATACCGGATC	con_contig01374	y4213_arath ame: full=upf0480 protein at4g32130 flags: precursor	2	133	190	1.43
8	s0813	GAACTTATTAGATACCGGATC	bud_contig15456	fatty acid desaturase 3	3	133	190	1.43
8	s0813	GAACTTATTAGATACCGGATC	chi_contig11263	cdp-diacylglycerol--glycerol-3- phosphate 3-phosphatidyltransferase	3	133	190	1.43
8	s0813	GAACTTATTAGATACCGGATC	chi_contig09142	omega-3 fatty acid desaturase	3	133	190	1.43
8	s0813	GAACTTATTAGATACCGGATC	bud_contig03186	y4213_arath ame: full=upf0480 protein at4g32130 flags: precursor	3	133	190	1.43
8	s0813	GAACTTATTAGATACCGGATC	con_contig11536	omega-3 fatty acid desaturase	3	133	190	1.43
8	s0813	GAACTTATTAGATACCGGATC	con_contig24543	ribulose- -bisphosphate carboxylase oxygenase large subunit	0	133	190	1.43
8	s0831	GAACTTATTAGATACCGGAT	chi_contig11263	cdp-diacylglycerol--glycerol-3- phosphate 3-phosphatidyltransferase	3	104	151	1.45
8	s0831	GAACTTATTAGATACCGGAT	bud_contig03186	y4213_arath ame: full=upf0480 protein at4g32130 flags: precursor	3	104	151	1.45
8	s0831	GAACTTATTAGATACCGGAT	con_contig24543	ribulose- -bisphosphate carboxylase oxygenase large subunit	0	104	151	1.45
9	s0931	CGTGCGGGCTGGGGGACGGA	chi_contig13452	af375428_1at4g29590 t16l4_100	3	738	1170	1.59
9	s0935	CGTGCGGGCTGGGGGACGGAC	chi_contig13452	af375428_1at4g29590 t16l4_100	3	102	162	1.59
10	s0333	CGGAACGAACGATGGCTTCAG	chi_contig15868	digalactosyldiacylglycerol synthase	0	3219	3121	0.97
10	s0333	CGGAACGAACGATGGCTTCAG	bud_contig08771	digalactosyldiacylglycerol synthase	0	3219	3121	0.97
10	s0333	CGGAACGAACGATGGCTTCAG	sta_contig08114	digalactosyldiacylglycerol synthase	0	3219	3121	0.97
10	s0333	CGGAACGAACGATGGCTTCAG	con_contig05046	digalactosyldiacylglycerol synthase	0	3219	3121	0.97
11	s0044	CCACCAGTGAGGGCTCTTCGG	chi_contig15799	inorganic pyrophosphatase	3	1656	862	0.52
11	s0044	CCACCAGTGAGGGCTCTTCGG	chi_contig15868	digalactosyldiacylglycerol synthase	0	1656	862	0.52
11	s0044	CCACCAGTGAGGGCTCTTCGG	con_contig05046	digalactosyldiacylglycerol synthase	0	1656	862	0.52
11	s0044	CCACCAGTGAGGGCTCTTCGG	bud_contig08771	digalactosyldiacylglycerol synthase	0	1656	862	0.52
11	s0044	CCACCAGTGAGGGCTCTTCGG	sta_contig08114	digalactosyldiacylglycerol synthase	0	1656	862	0.52
11	s0044	CCACCAGTGAGGGCTCTTCGG	chi_contig04579	rna binding	2	1656	862	0.52
12	s0006	CAAGCACAACGGATGTGGTCT	sta_contig10736	unnamed protein product [Arabidopsis thaliana]	3	1060	328	0.31
13	s0905	ATAGGACTTTACAACGAAATCGGA	chi_contig13544	catalase	3	499	771	1.55
13	s0905	ATAGGACTTTACAACGAAATCGGA	sta_contig09826	catalase	3	499	771	1.55
13	s0905	ATAGGACTTTACAACGAAATCGGA	con_contig04769	catalase	3	499	771	1.55
14	s0655	AGGTGGTGGAACGAGAAGACTCGC	chi_contig02592	photomorphogenesis repressor protein	2	939	1160	1.24
14	s0655	AGGTGGTGGAACGAGAAGACTCGC	con_contig19247	photomorphogenesis repressor protein	2	939	1160	1.24
14	s0833	AGGTGGTGGAACAAGAAGACTCAT	con_contig22662	calnexin homolog	3	126	183	1.45
14	s0833	AGGTGGTGGAACAAGAAGACTCAT	bud_contig00833	calnexin homolog	3	126	183	1.45
14	s0833	AGGTGGTGGAACAAGAAGACTCAT	sta_contig06168	calnexin homolog	3	126	183	1.45
14	s0852	AGGTGGTGGAACGAGAAGACTCAT	con_contig19247	photomorphogenesis repressor protein	2	101	149	1.48
14	s0852	AGGTGGTGGAACGAGAAGACTCAT	chi_contig02592	photomorphogenesis repressor protein	2	101	149	1.48
14	s1045	AGGTGGTGGAACAAGAAGACTCA	sta_contig06168	calnexin homolog	3	117	207	1.77
15	s1036	AGAGGGTAGAGGAAGCTTCTG	chi_contig04323	at4g21150 f7j7_90	3	825	1449	1.76
16	s1036	AGAGGGTAGAGGAAGCTTCTG	chi_contig01353	accelerated cell death 1	3	825	1449	1.76
16	s1036	AGAGGGTAGAGGAAGCTTCTG	con_contig01834	chlorophyll a oxygenase	3	825	1449	1.76
17	s1036	AGAGGGTAGAGGAAGCTTCTG	sta_contig03731	at4g21150 f7j7_90	3	825	1449	1.76
17	s1036	AGAGGGTAGAGGAAGCTTCTG	sta_contig05412	lethal leaf-spot 1 homolog lls1	3	825	1449	1.76
17	s1036	AGAGGGTAGAGGAAGCTTCTG	bud_contig03327	at4g21150 f7j7_90	3	825	1449	1.76
18	s0869	AAAGGATGTAACCCCGGTGTA	bud_contig16278	unknown protein [Arabidopsis thaliana]	2	1639	2466	1.5
19	s0910	TGGAGACACATATTAACCCTGA		ND		722	1123	1.56
20	s0998	TGGAACCCTGAACAGACTGCCGGTGAT		ND		784	1308	1.67
21	s0995	TGGAACCCTGAACAGACTGCCGGTGA		ND		153	255	1.67
22	s1148	TGAGAACCCTTTGATCGTCGCC		ND		628	1269	2.02
23	s1084	GGGACGAAGAAAGAGATGAGGGTG		ND		991	1820	1.84
24	s1274	GCGGTGCGAGGCTGAGTTTGCATG		ND		271	1070	3.95
25	s0105	GAAGCCATCGTTCGTTCCGCC		ND		913	620	0.68
26	s1171	CGACTTCTTGGAAATCCGGCT		ND		768	1612	2.1
27	s0870	AGGTGGGAGGTAGGTGAGCGGTA		ND		432	650	1.5
27	s0921	AGGTGGGAGGTAGGTGAGCGGTAT		ND		182	285	1.57
27	s0871	AGGTGGGAGGTAGGTGAGCGGTAG		ND		639	964	1.51
28	s1016	ACCCTGTCGCGACACGAGGCGC		ND		410	700	1.71
28	s0888	ACCCTGTCGCGACACGAGGCG		ND		196	299	1.53
